# Supplementary material
Source: Springer Nature journal article supplement (https://www.springermedizin.de/resource/supplementary/12995_2013_287_MOESM1_ESM.pdf/9623068)

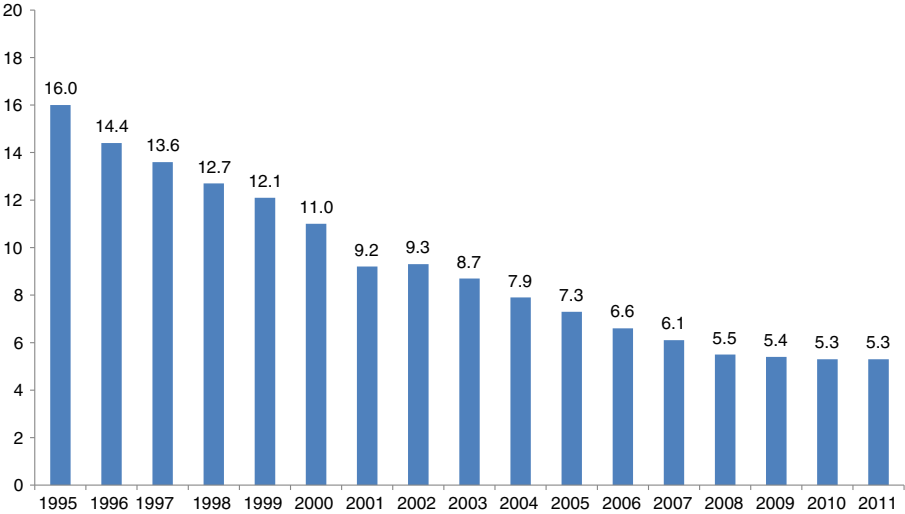

Supplement: MOESM1 [file 9623068]
